# Supplementary material for: Spatial detection of fetal marker genes expressed at low level in adult human heart tissue
Source: PubMed Central journal article supplement (PMC5636908; doi:10.1038/s41598-017-13462-5), 2017-10-11
Supplement: 41598_2017_13462_MOESM1_ESM.pdf [file 41598_2017_13462_MOESM1_ESM.pdf]

# **Supplementary Material for**

## **Spatial detection fetal marker genes expressed at low level in adult human heart tissue**

Michaela Asp<sup>1</sup>, Fredrik Salmén<sup>1†</sup>, Patrik L. Ståhl<sup>2†</sup>, Sanja Vickovic<sup>1†</sup>, Ulrika Felldin<sup>3</sup>,  
Marie Löfling<sup>3</sup>, José Fernandez Navarro<sup>2</sup>, Jonas Maaskola<sup>1</sup>, Maria J. Eriksson<sup>3,4</sup>, Bengt  
Persson<sup>5,6</sup>, Matthias Corbascio<sup>7</sup>, Hans Persson<sup>8,9</sup>, Cecilia Linde<sup>10,11</sup>, Joakim  
Lundeberg<sup>1\*</sup>

\*Correspondence to Joakim Lundeberg; [joakim.lundeberg@scilifelab.se](mailto:joakim.lundeberg@scilifelab.se)

### **This PDF file includes:**

Supplementary figures

Supplementary tables

**Supplementary Figure 1.**

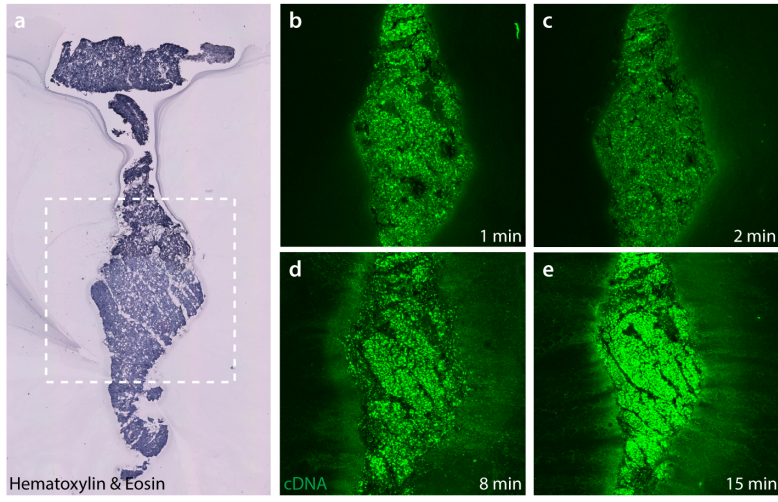

**Supplementary Figure 2.**

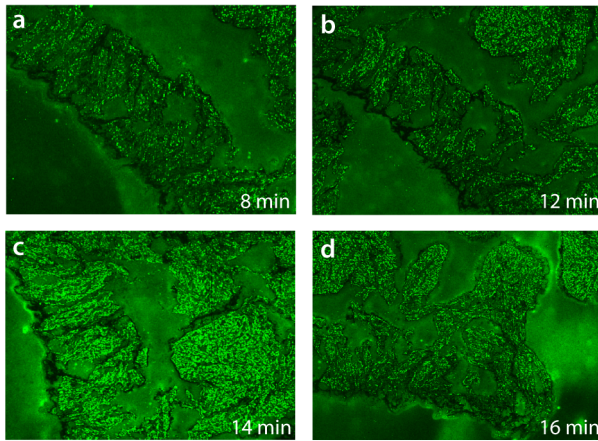

**Supplementary Figure 3**

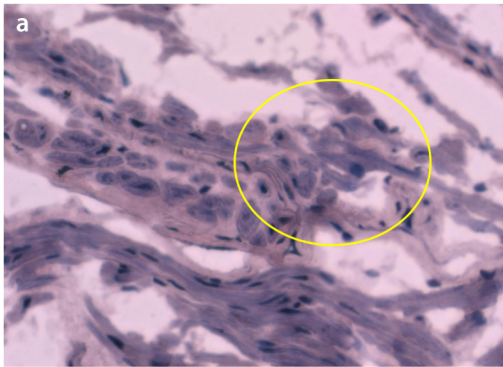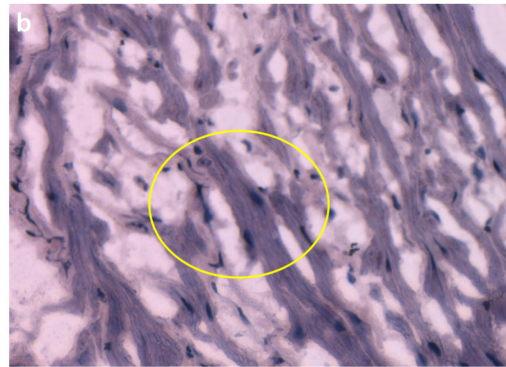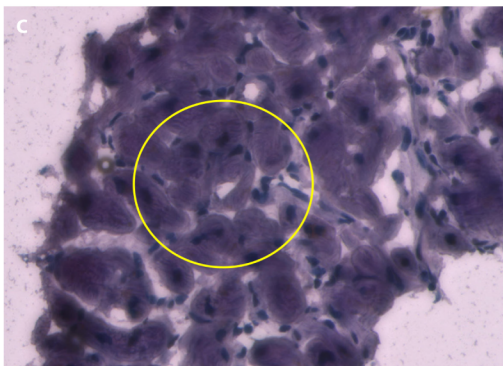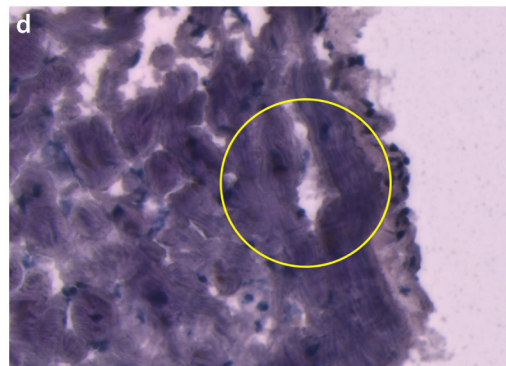

### Supplementary Figure 4.

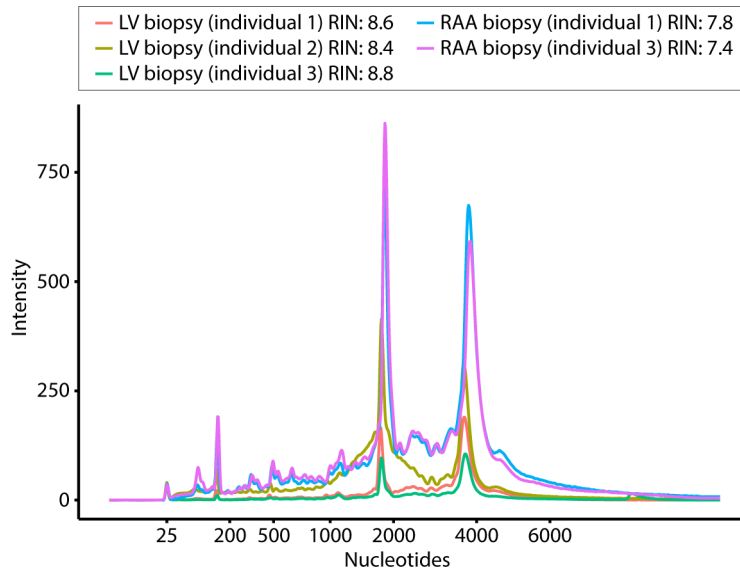

## Supplementary Figure 5.

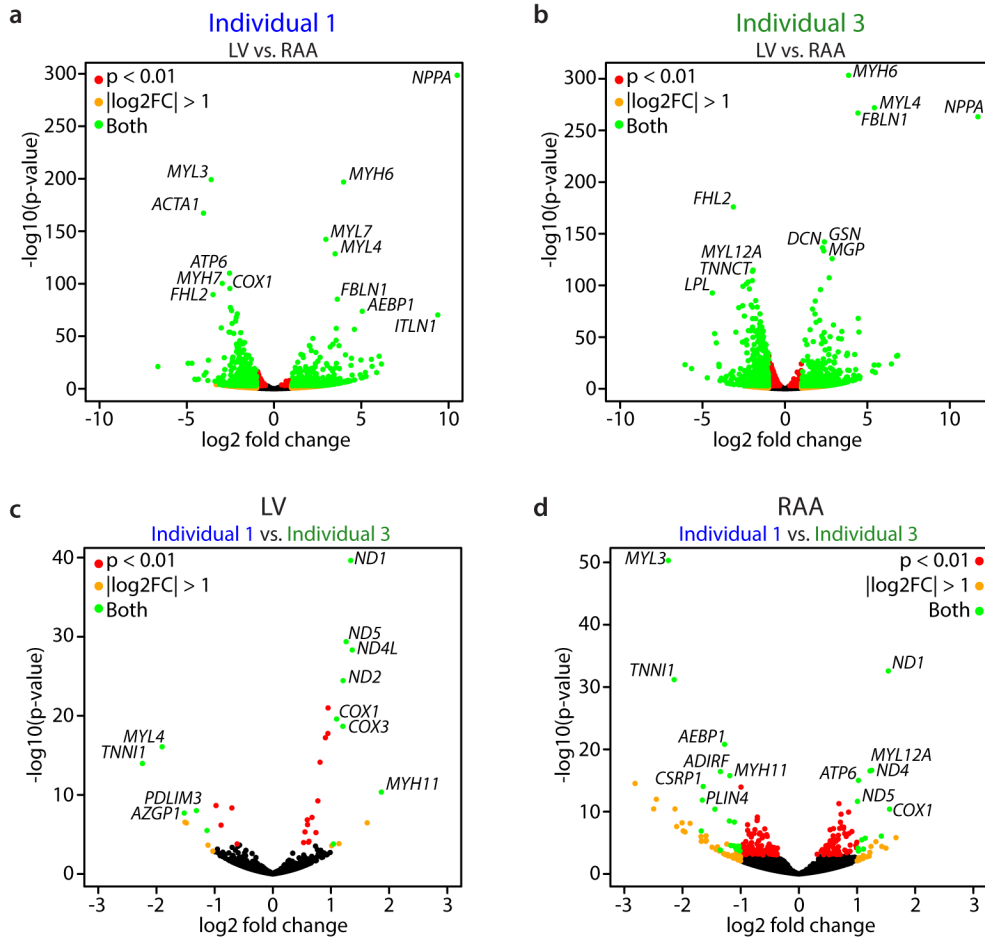

Supplementary Figure 6.

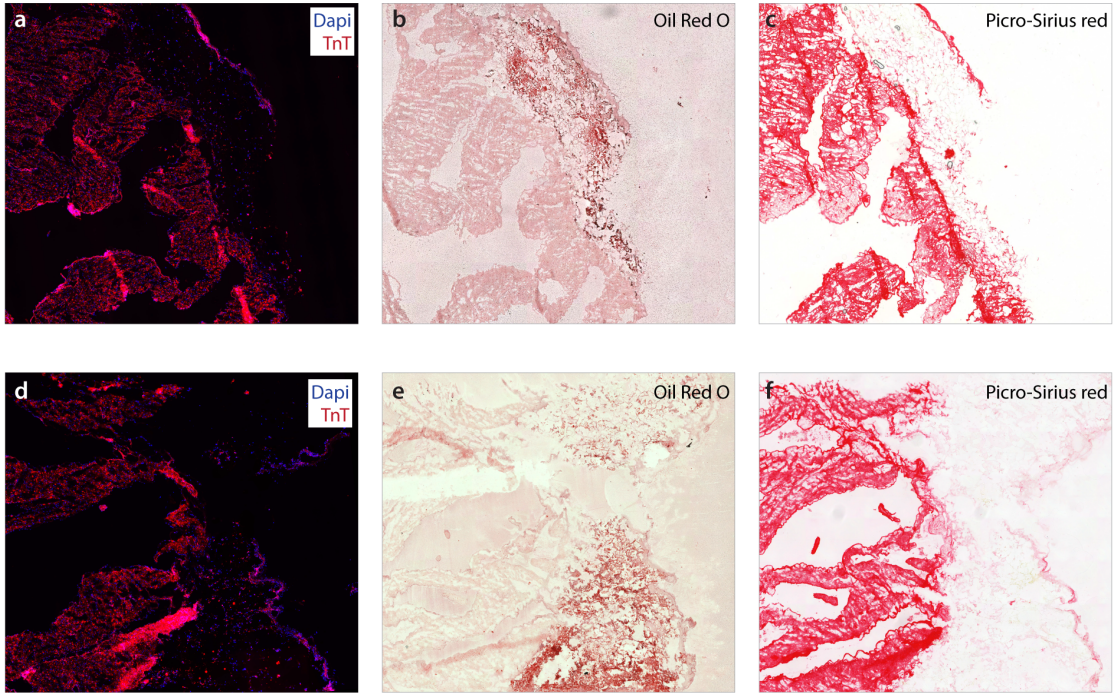

## Supplementary Figure 7.

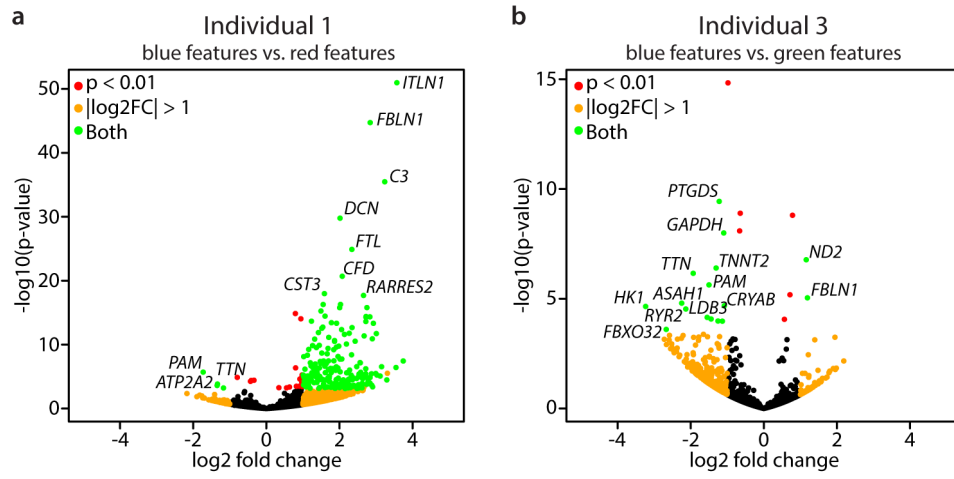



**Supplementary Table 1.**

|                     | <b>NKX2.5</b> | <b>GATA4</b> | <b>TBX5</b>  | <b>TBX20</b> | <b>SSEA-1</b> | <b>HOPX</b>  |
|---------------------|---------------|--------------|--------------|--------------|---------------|--------------|
| <b>LV</b>           | 70/348379     | 9/348379     | 8/348379     | 0/348379     | 0/348379      | 2/348379     |
| <b>Individual 1</b> | 121 features  | 121 features | 121 features | 121 features | 121 features  | 121 features |
| <b>RAA</b>          | 207/1240352   | 77/1240352   | 119/1240352  | 6/1240352    | 6/1240352     | 21/1240352   |
| <b>Individual 1</b> | 574 features  | 574 features | 574 features | 574 features | 574 features  | 574 features |
| <b>LV</b>           | 30/351861     | 16/351861    | 6/351861     | 0/351861     | 1/351861      | 1/351861     |
| <b>Individual 2</b> | 107 features  | 107 features | 107 features | 107 features | 107 features  | 107 features |
| <b>LV</b>           | 47/364420     | 17/364420    | 10/364420    | 0/364420     | 0/364420      | 2/364420     |
| <b>Individual 3</b> | 192 features  | 192 features | 192 features | 192 features | 192 features  | 192 features |
| <b>RAA</b>          | 241/1817145   | 86/1817145   | 145/1817145  | 0/1817145    | 18/1817145    | 33/1817145   |
| <b>Individual 3</b> | 899 features  | 899 features | 899 features | 899 features | 899 features  | 899 features |

**Supplementary Table 2.**

|                         | <b>NKX2.5</b>              | <b>GATA4</b>             | <b>TBX5</b>                | <b>TBX20</b>         | <b>SSEA-1</b>            | <b>HOPX</b>             |
|-------------------------|----------------------------|--------------------------|----------------------------|----------------------|--------------------------|-------------------------|
| <b>LV Individual 1</b>  | 70/166926<br>48 features   | 9/25262<br>7 features    | 8/30695<br>8 features      | 0/0<br>0 features    | 0/0<br>0 features        | 2/9472<br>2 features    |
| <b>RAA Individual 1</b> | 207/363226<br>155 features | 77/135571<br>62 features | 119/231334<br>97 features  | 6/2880<br>4 features | 6/16940<br>6 features    | 21/43163<br>20 features |
| <b>LV Individual 2</b>  | 30/74876<br>26 features    | 16/38437<br>13 features  | 6/11786<br>6 features      | 0/0<br>0 features    | 1/1045<br>1 feature      | 1/2762<br>1 feature     |
| <b>LV Individual 3</b>  | 47/97531<br>33 features    | 17/37930<br>13 features  | 10/26111<br>7 features     | 0/0<br>0 features    | 0/0<br>0 features        | 2/3445<br>1 feature     |
| <b>RAA Individual 3</b> | 241/467853<br>198 features | 86/161717<br>73 features | 145/288333<br>127 features | 0/0<br>0 features    | 18/31980<br>18 features3 | 33/82292<br>32 features |

## Supplementary Figure 8.

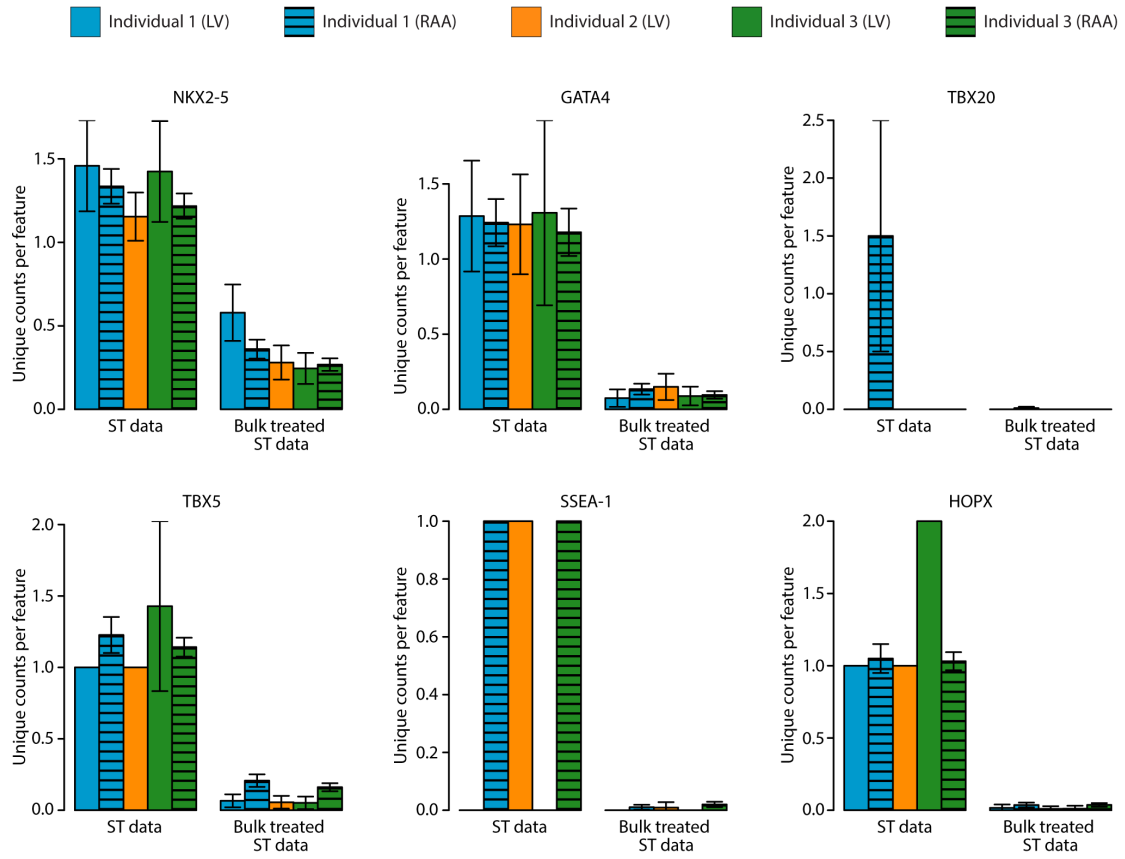

## Supplementary Figure 9.

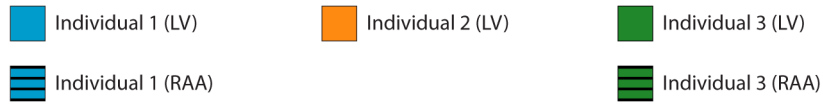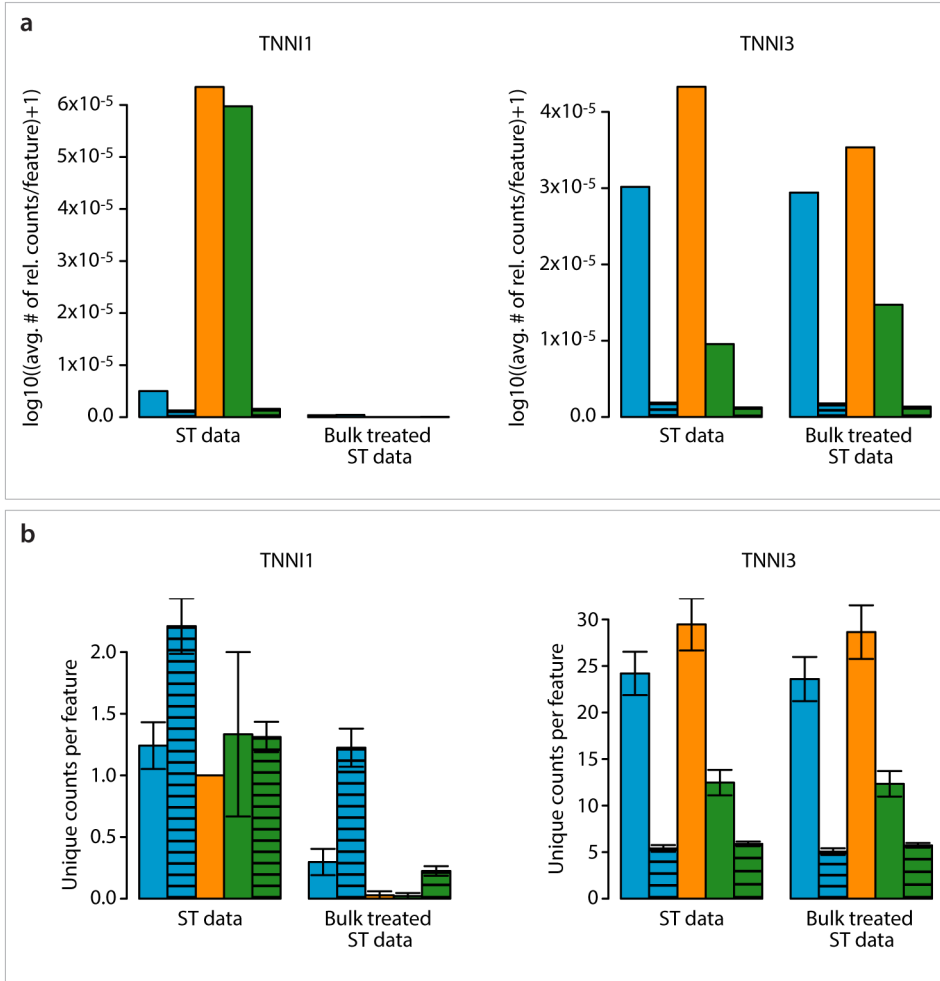

### Supplementary Table 3.

|                     | <b>TNNI1</b> | <b>TNNI3</b> |
|---------------------|--------------|--------------|
| <b>LV</b>           | 36/348379    | 2856/348379  |
| <b>Individual 1</b> | 121 features | 121 features |
| <b>RAA</b>          | 703/1240352  | 2903/1240352 |
| <b>Individual 1</b> | 574 features | 574 features |
| <b>LV</b>           | 3/351861     | 3065/351861  |
| <b>Individual 2</b> | 107 features | 107 features |
| <b>LV</b>           | 4/364420     | 2370/364420  |
| <b>Individual 3</b> | 192 features | 192 features |
| <b>RAA</b>          | 202/1817145  | 5153/1817145 |
| <b>Individual 3</b> | 899 features | 899 features |

### Supplementary Table 4.

|                         | <b>TNNI1</b>               | <b>TNNI3</b>                 |
|-------------------------|----------------------------|------------------------------|
| <b>LV Individual 1</b>  | 36/107606<br>29 features   | 2856/348376<br>118 features  |
| <b>RAA Individual 1</b> | 703/741278<br>318 features | 2903/1235889<br>538 features |
| <b>LV Individual 2</b>  | 3/6845<br>3 features       | 3065/295680<br>104 features  |
| <b>LV Individual 3</b>  | 4/9691<br>3 features       | 2370/566356<br>190 features  |
| <b>RAA Individual 3</b> | 202/357448<br>154 features | 5153/2050541<br>875 features |

## **Figure legends.**

### **Supplementary Figure 1.**

#### **Illustrative results of quality control assay of consecutive tissue sections from a right ventricle needle biopsy.**

(a) Hematoxylin- and eosin-stained tissue section, the marked area corresponds to the area shown in panels b-e. **(b-e)** Cy-3 signals from 10  $\mu\text{m}$  tissue sections treated with 0.1% (w/v) pepsin for indicated times showing increase in amounts of transcripts diffusing from the tissue with time. Intensities of signals from sections shown in panels c, d and e are 0.63-, 1.25- and 1.5-fold stronger than those from the section shown in panel b. Samples derive from the same experiment and images were processed in parallel using the GenePix Pro 5.0 software.

### **Supplementary Figure 2.**

#### **Illustrative results of quality control assay of RAA tissue sections.**

**(a-d)** Cy-3 signals from 5  $\mu\text{m}$  tissue sections treated with 0.2% pepsin (w/v), for indicated times: intensities of signals from sections shown in panels b, c and d are 2-, 5- and 2.6-fold stronger than those from the section shown in panel a. Samples derive from the same experiment and images were processed in parallel using the GenePix Pro 5.0 software.

### **Supplementary Figure 3**

#### **Magnified images of cardiac tissue sections and the corresponding feature position at that location.**

**(a-d)** Hematoxylin and eosin stained cardiac tissue sections where the yellow circles indicate the position of the underlying feature. **(a, b)** Features covering a cross-section and longitudinal section of cardiomyocytes from the RAA. **(c, d)** Features covering a cross-section and longitudinal section of cardiomyocytes from the LV.

### **Supplementary Figure 4.**

#### **RNA quality of adult cardiac biopsies included in this study.**

### **Supplementary Figure 5.**

#### **Variations in gene expression within and between individuals.**

**(a-d)** Volcano plots showing differential gene expression between LV and RAA tissue sections (a, b), and tissue sections from the same cardiac region but different individuals (c, d). Numbers of genes with a  $|\log_2\text{fold change}| > 1$  and an adjusted p-value  $< 0.01$  in the comparisons shown in panels a, b, c and d are 911, 1061, 13 and 31, respectively.



## **Supplementary Figure 6.**

### **Histological staining of RAA tissue sections.**

Consecutive tissue sections of RAA from individual 1 (**a-c**) and individual 3 (**d-f**). Tropin T (TnT), Oil Red O and Picro-Sirius red show the spatial location of cardiomyocytes, adipose tissue and collagen (extracellular matrix).

## **Supplementary Figure 7.**

### **Differential gene expression within RAA tissue sections.**

(a) Volcano plot showing DE genes between the blue and red areas in Fig. 3b. Numbers of genes with a  $|\log_2\text{fold change}| > 1$  and an adjusted p-value  $< 0.01$  in blue and red areas are 4 and 212, respectively. (b) Volcano plot showing DE genes between the blue and green areas in Fig. 3f. Data for the COX1 gene is not shown here as it had a substantially lower p-value ( $2.8 \times 10^{-99}$ ) than all other genes. Numbers of genes with a  $|\log_2\text{fold change}| > 1$  and adjusted p-value  $< 0.01$  in blue and green areas are 14 and 2, respectively.

## **Supplementary Table 1.**

### **Bulk treated ST data.**

Here, unique read counts are aggregated from features of two replicates. Upper panel: Unique read counts of the indicated fetal gene/Total number of unique read counts. Lower panel: Number of features within the two replicates.

## **Supplementary Table 2.**

### **ST data.**

Here, unique read counts are based only from features of two replicates expressing the indicated fetal gene. Upper panel: Unique read counts of the indicated fetal gene/Total number of unique read counts from features expressing the indicated fetal gene. Lower panel: Number of features within the two replicates that express the fetal gene.

## **Supplementary Figure 8.**

### **Number of fetal gene read counts per feature.**

Barplots showing unique fetal gene read counts per feature. In the ST data, the number of features is based on features displaying read counts from indicated fetal marker gene. In the bulk treated ST data, the number of features is based on the total amount of features within the dataset. Error bars indicate standard errors.

## **Supplementary Figure 9.**

### **Detection of TNNI1 and TNNI3 expression within adult heart tissue sections.**

(a) Barplots showing the average number of relative fetal gene counts per feature, as described in Fig. 4. (b) Barplots showing unique TNNI1 and TNNI3 read counts per feature, as described in Supplementary Fig. 8. Error bars indicate standard errors.

### **Supplementary Table 3.**

#### **Bulk treated ST data.**

Here, unique read counts are aggregated from features of two replicates. Upper panel: Unique read counts of the indicated gene (TNNI1 or TNNI3)/Total number of unique read counts. Lower panel: Number of features within the two replicates.

### **Supplementary Table 4.**

#### **ST data.**

Here, unique read counts are based only from features of two replicates expressing the indicated gene (TNNI1 or TNNI3). Upper panel: Unique read counts of the indicated gene/Total number of unique read counts from features expressing the indicated gene. Lower panel: Number of features within the two replicates that express either TNNI1 or TNNI3.
